1 **Metagenomic analysis of a blood stain from the French revolutionary Jean-Paul Marat (1743-**  
2 **1793)**

3  
4 Toni de-Dios<sup>1\*</sup>, Lucy van Dorp<sup>2\*+</sup>, Philippe Charlier<sup>3,4\*</sup>, Sofia Morfopoulou<sup>2,5</sup>, Esther Lizano<sup>1</sup>,  
5 Celine Bon<sup>6</sup>, Corinne Le Bitouzé<sup>7</sup>, Marina Alvarez-Estape<sup>1</sup>, Tomas Marquès-Bonet<sup>1,8,9,10</sup>,  
6 François Balloux<sup>2+</sup>, Carles Lalueza-Fox<sup>1+</sup>

7  
8 <sup>1</sup>Institute of Evolutionary Biology (CSIC-Universitat Pompeu Fabra), 08003 Barcelona, Spain

9 <sup>2</sup>UCL Genetics Institute, University College London, London WC1E 6BT, UK

10 <sup>3</sup>Département de la Recherche et de l'Enseignement, Musée du Quai Branly - Jacques Chirac,  
11 75007 Paris, France

12 <sup>4</sup>Université Paris-Saclay (UVSQ), Laboratory Anthropology, Archaeology, Biology (LAAB),  
13 78180 Montigny-le-bretonneux, France

14 <sup>5</sup>Division of Infection and Immunity, University College London, London WC1E 6BT, UK

15 <sup>6</sup>Département Hommes, Natures, Sociétés, Muséum National d'Histoire Naturelle, 75116 Paris,  
16 France

17 <sup>7</sup>Archives Nationales, 75004 Paris, France

18 <sup>8</sup>Catalan Institution of Research and Advanced Studies (ICREA), 08010 Barcelona, Spain

19 <sup>9</sup>CNAG-CRG, Centre for Genomic Regulation, Barcelona Institute of Science and Technology  
20 (BIST), 08036 Barcelona, Spain

21 <sup>10</sup>Institut Català de Paleontologia Miquel Crusafont, Universitat Autònoma de Barcelona,  
22 08193 Cerdanyola del Vallès, Barcelona, Spain

23  
24 \*These authors equally contributed to this work

25 + Co-corresponding authors

26  
27 **Keywords**

28 Ancient DNA, metagenomics, infection

29  
30 **Abstract**

31  
32 The French revolutionary Jean-Paul Marat (1743-1793) was assassinated in 1793 in his  
33 bathtub, where he was trying to find relief from the debilitating skin disease he was suffering  
34 from. At the time of his death, Marat was annotating newspapers, which got stained with his  
35 blood and were subsequently preserved by his sister. We extracted and sequenced DNA from  
36 the blood stain and also from another section of the newspaper, which we used for  
37 comparison. Results from the human DNA sequence analyses were compatible with a  
38 heterogeneous ancestry of Marat, with his mother being of French origin and his father born in  
39 Sardinia. Metagenomic analyses of the non-human reads uncovered the presence of fungal,  
40 bacterial and low levels of viral DNA. Relying on the presence/absence of microbial species in  
41 the samples, we could cast doubt on several putative infectious agents that have been  
42 previously hypothesised as the cause of his condition but for which we detect not a single  
43 sequencing read. Conversely, some of the species we detect are uncommon as environmental  
44 contaminants and may represent plausible infective agents. Based on all the available  
45 evidence, we hypothesize that Marat may have suffered from a fungal infection (seborrheic  
46 dermatitis), possibly superinfected with bacterial opportunistic pathogens.

## 48 **1 Introduction**

49

50 Jean-Paul Marat (1743-1793) was a famous French physician, scientist and journalist, best  
51 known for his role as Jacobin leader during the French Revolution. Marat's parents were  
52 Giovanni Mara, born in Cagliari, Sardinia, who later added a "t" to his family name to give it a  
53 French feel and Louise Cabrol, a French Huguenot from Castres. Marat was stabbed to death in  
54 his bathtub by the Girondist' supporter Charlotte Corday on July 13<sup>th</sup>, 1793 (Figure 1a). Upon  
55 his death, his sister Charlotte Albertine kept two issues of Marat's newspaper *l'Ami du Peuple*  
56 (n°506 and n°678, published on June 30<sup>th</sup>, 1791 and August 13<sup>th</sup>, 1792, respectively), which he  
57 was annotating the day of his assassination and that got stained with his blood (Figure 1b).  
58 Albertine gave the issues to the collector François-Nicolas Maurin (1765-1848) in 1837. After  
59 his death, as explained by a handwritten note by writer Anatole France dated from October  
60 10<sup>th</sup>, 1864, the two issues ended up in the possession of baron Carl De Vinck who in 1906  
61 donated them to the Département des Estampes, Bibliothèque National de France, in Paris  
62 (see notice in the Catalogue Général: <https://catalogue.bnf.fr/ark:/12148/cb40261215w>).

63

64 Marat's health during the last years before his assassination is shrouded in mystery. He  
65 suffered from a severe itching skin disease from which he found some relief by spending most  
66 of his time in a medicinal bathtub over which he placed a board to use as a writing desk. His  
67 condition, which he attributed to his stay in the sewers of Paris while hiding from his political  
68 enemies, has been the subject of numerous medical debates and has been alternatively  
69 attributed to scabies, syphilis, atopic eczema, seborrheic dermatitis or dermatitis herpetiformis  
70 (1–5), the latter as a potential manifestation of celiac disease (6). It has been suggested that  
71 his condition affected his character and turned it more violent (1).

72

73 With the intention of shedding light on these issues, we retrieved two samples from one of the  
74 newspapers stained with Marat's blood, one sample from the blood stain and a second one  
75 from a non-stained area in the upper corner of the paper, to be used as a comparison. A  
76 principal concern was to use a non-destructive approach to explore Marat's genomic footprint;  
77 therefore, the samples were taken with forensic swabs. The DNA extracted from both samples  
78 was used to build genomic libraries that were subjected to second-generation sequencing  
79 using the Illumina platform. DNA reads were subsequently classified, separating the human  
80 reads – most likely deriving from Marat's blood – from those assigned to microbial species. The  
81 analysis of both sets of DNA sequences allowed characterisation of Marat's ancestry as well as  
82 identification of the potential pathogens responsible for his debilitating skin condition.

83

## 84 **2 Material and methods**

85

### 86 *2.1 DNA extraction and sequencing*

87 Forensic swabs were obtained from one of the newspapers Marat was annotating at the time  
88 of his assassination (Figure 1). One swab was taken from the blood stain and another from an  
89 area of the newspaper without visual evidence of blood. The blood swab was extracted with a  
90 buffer composed of 10 mM TrisHCl, 10 mM EDTA, 2 mM SDS, 50 mM DTT; proteinase K was  
91 added after one hour incubation. The extract was subsequently concentrated and purified  
92 using a Qiagen column kit. DNA extraction from both swabs was performed together with  
93 extraction blanks (no sample). A total of 35 µl of each sample was used for library preparation  
94 following the BEST protocol (7). Libraries were quantified using BioAnalyzer and sequenced by  
95 HiSeq 4000 (Illumina). Library blanks were also performed for each library batch. We  
96 generated 568,623,176 DNA reads from the blood stain, of which 74,244,610 reads mapped to  
97 the human reference genome (Table S1). From these, we retrieved a complete human  
98 mitochondrial (mtDNA) genome at a mean depth of coverage of 18.156X and a nuclear  
99 genome at 0.125X.

100

## 101 *2.2 Mapping and variant calling*

102 Raw sequences adapters were removed using *Cutadapt* (8). Reads were then aligned against  
103 the Human Reference genome (GRCh37/hg19) and the mitochondrial reference genome (rCRS)  
104 as well as for a set of microbial candidates using *BWA* v.07.3 (9) and *Bowtie2* (10). We  
105 employed two aligners as mapping sensitivity of different aligners can vary between different  
106 samples when working with aDNA (11). Duplicate reads were discarded using *Picard* tools (12).  
107 Unique mapped reads were filtered for a mapping quality equal of above 30 (Table S1). All  
108 mapped sequences (human nuclear, human mitochondrial and microbial) were assessed for  
109 post-mortem damage patterns at the ends of reads using *MapDamage* v.2 (13), which can be  
110 used as a sign of historic authenticity over modern contamination (Fig. S1). Post-mortem  
111 damage signals were also obtained for each read using *pmdtools* (14) (Fig. S2). Mapping  
112 statistics including the depth of coverage were recorded using *Qualimap* (15). Due to the low  
113 coverage of the human sample, we performed a pseudo-haploid calling approach, common to  
114 the processing of aDNA, using the *SAMtools Pileup* tool (16). This data was then merged with  
115 the Human Origins dataset for its use in population genetics analyses (17,18).

116

## 117 *2.3 Modern DNA Contamination*

118 *Schmutzi* was used to estimate the amount of modern DNA contamination in the  
119 mitochondrial (mtDNA) genome (19) likely deriving from the DNA of those who have handled  
120 the newspaper in the years following Marat's death. We identified mitochondrial  
121 contamination based on the inferred deamination patterns as 52.5% +/- 4.5% with the full  
122 haplogroup profiles provided in Table S2. This allowed the modern DNA sequences to be  
123 delineated from the ancient DNA sequences using *Jvarkit* and a custom script (20) by selecting  
124 the human reads with mismatches in their first or last three nucleotides. This reduced the  
125 amount of modern mtDNA contamination to 0-0.1%. The depth of coverage was recorded  
126 using *Qualimap*.

127

128 We also independently estimated the amount of contamination based on the heterozygous  
129 sites in the X chromosome using *angsd* v0.925-21 (21,22). We obtained an estimate of 3.2%  
130 modern contamination. As with the mtDNA genome we filtered reads with mismatches in the  
131 first or last three nucleotides, taking forward only those reads for additional population  
132 genetics analyses. After applying both filters, the resultant mean depth of coverage for the  
133 mitochondrial genome was 4.038x and 0.029x for the nuclear genome.

134

## 135 *2.4 Uniparental Markers and sex Determination analyses*

136 The mtDNA haplogroup was determined using *SAMtools* pileup tool calling the positions  
137 defined in the *Phylotree* database (23). We used a genome browser (*IGV*.v2.4.14) to study the  
138 genomic context of each possible SNP (24). Only those SNPs that were present in two or more  
139 reads, and those which were not located at the ends of the reads, were considered. The  
140 contamination was estimated by calculating the ratio of discordant reads at haplogroup-  
141 diagnostic positions. Molecular sex was assigned with *Ry\_compute* (22), a script designed for  
142 the sex identification of low coverage individuals (Fig. S3).

143

## 144 *2.5 Population Genetics Analysis*

145 Principal Component Analysis (PCA) was performed using *SmartPCA* in *EIG* v6.0.1 with a subset  
146 of modern individuals from the Human Origins dataset (25). This subset contained 434  
147 present-day Europeans and 616,938 autosomal SNPs, plus our sample (Figure 2). The Marat  
148 sample was projected using the option *Isqproject*. We also considered the Marat sample  
149 projected into an expanded dataset of West Eurasian populations (Fig. S4). As projected  
150 individuals' components tend to 0, we also carried out a control analysis using Han Chinese,

151 French and Marat (Fig. S5). The results were visualised using the R package *GGplot2* (26). This  
152 dataset confirmed that Marat is not artefactually placed at the centre of the plot.

153

154 To formally test the relationship of the Marat sample to relevant geographic regions we  
155 calculated  $f_4$  statistics of the form  $f_4(\text{Mbuti}, \text{Marat}; X, Y)$  where X and Y are tested for  
156 combinations of possible ancestral sources: Sardinian, French, English, Italian\_North, Basque,  
157 Spanish.  $f_4$  values were calculated in qpDstat of AdmixTools v.5.0 (27) with statistical  
158 significance assessed through Z-scores following jack-knife resampling (Table S3). This statistic  
159 tests the covariance in allele frequency differences between an African out-group (Mbuti) and  
160 Marat relative to the clade formed by X and Y. Positive values of  $f_4$  indicate a closer affinity of  
161 Marat to Y relative to X, with negative values indicating a closer relationship of Marat to X  
162 relative to Y.

163

164 We additionally ran an unsupervised clustering analysis using *ADMIXTURE* v1.3 and another  
165 subset of the Human Origins dataset (28). This subset included 881 individuals from Europe,  
166 West Asia and North Africa typed over 616,938 shared autosomal SNPs. We filtered the  
167 dataset by removing SNPs in high linkage disequilibrium using PLINK.v1.9 (29), removing all  
168 SNPs with a  $r^2$  threshold of 0.4 within a 200 SNP sliding window, advancing by 50 SNPs each  
169 time. We performed the clustering analysis using K values ranging from 1 to 10, with 10  
170 replicates for each value of K. We selected K according to the lowest cross-validation error  
171 value (K=4). The *ADMIXTURE* results at K=4 were visualised using Pong (30) (Figure 2).

172

### 173 *2.6 Metagenomic analysis*

174 We first removed adapters and merged the paired-end reads into longer single-end sequences  
175 using AdapterRemoval v2 (31). We removed PCR duplicates with exact sequence identity using  
176 dedupe from the BBMap suite of tools (<https://sourceforge.net/projects/bbmap/>). We  
177 subsequently used the default preprocessing pipeline designed for metaMix which consists of  
178 removing human and rRNA sequences using bowtie2 followed by megaBLAST, as well as low  
179 quality and low complexity reads using prinseq (32) (-lc\_method dust -lc\_threshold 7 -  
180 min\_qual\_mean 15). The number of reads filtered at each step are provided in Table S4. We  
181 screened the remaining high quality DNA reads for the presence of possible pathogens using  
182 both KrakenUniq (33) against the Kraken database compiled in Lassalle et al 2018 (34) and  
183 metaMix (35) using megaBLAST and a local custom database consisting of the RefSeq  
184 sequences of bacteria, viruses, parasites, fungi and human, as of July 2019. KrakenUniq was  
185 run with default parameters. The metaMix-nucleotide mode was run with the default read  
186 support parameter of 10 reads was used (Table S5) and the default number of 12 MCMC  
187 chains. The number of the MCMC iterations is automatically calculated by metaMix based on  
188 the number of species to explore for each dataset, resulting in 10,000 iterations for the blood  
189 sample and 3,230 iterations for the paper swab.

190

191 The relative proportion of reads assigned to different species by KrakenUniq and metaMix was  
192 highly correlated;  $R^2=0.94$  and  $R^2=0.82$ , for the blood stain and the unstained paper,  
193 respectively (Fig. S6). However, metaMix tended to assign a higher number of reads to  
194 individual species, closer to the number found by mapping directly to the microbial genomes  
195 and we observed important discrepancies for the number of reads assigned to some of the  
196 species (Table S6). Additionally, metaMix results for both the blood stain and the unstained  
197 paper consisted of fewer species compared to KrakenUniq, even when the same read support  
198 threshold was applied to KrakenUniq, indicating increased specificity due to the MCMC  
199 exploration of the species space, that comes at an increased computational cost.

200

201 In order to compare the accuracy of the two assignment tools, we further explored the  
202 presence of clinically relevant species by mapping the quality-filtered subset of reads (Table

203 S2) used in metagenomic assignment against the reference genomes of different candidate  
204 genera of fungi and bacteria using *bowtie2* (10) and *BWA* v.07.3 (Fig. S7-S13). For all reads  
205 mapping to individual reference genomes, *mapDamage* v2 (13) was also run to assess evidence  
206 of nucleotide mis-incorporation characteristic of post-mortem damage. These mapping results  
207 were systematically supporting the metaMix assignments over those obtained with  
208 KrakenUniq (Table S6). This led us to rely on metaMix for all metagenomic assignments  
209 presented in the paper.

210

211 Besides testing for the presence and absence of species, we tested whether some  
212 microorganisms were overrepresented in the blood stain compared to the unstained section of  
213 the paper using a one-sided binomial test and a significance threshold of 0.95 (Table S5).

214

215 As an additional control, we also conducted metagenomic analysis of two publicly available  
216 ancient metagenomes obtained from parchment of comparable age to the Marat newspaper  
217 (36). We followed the same pre-processing pipeline described for the Marat samples, first  
218 removing adapters and PCR duplicates before employing the default metaMix pre-processing  
219 pipeline, this time removing reads that mapped to either the human or sheep, cow and goat  
220 reference genomes. As before, metaMix-nucleotide mode was run with with a read support  
221 parameter of 10 reads and with 12 MCMC chains x 2,325 and 6,130 iterations respectively for  
222 ERR466100 and ERR466101. We provide the breakdown of read filtering steps in Table S7 and  
223 our raw metaMix results in Table S8.

224

## 225 2.7 Phylogenetic analysis

226 In the case of *Malassezia*, a phylogenetic analysis of the mitochondrial DNA genome with  
227 available modern strains on the Short Read Archive (SRA) was performed. We called variant  
228 positions using *GATK UnifiedGenotyper* (37) and generated a Maximum Likelihood tree using  
229 *RAxML-NG* specifying a GTR substitution model and 100 bootstrap resamples (38). The tree  
230 was rooted with *M. globosa* (Fig. S10).

231

232 We also conducted a phylogenetic analysis for *C. acnes*, combining our historical strain with all  
233 *C. acnes* genomes deposited in the SRA covering the reference at an average depth >10x, and  
234 with *C. namnetense* as an outgroup (SRR9222443). The only *C. acnes* genomes sequenced at  
235 medium to high depth are those reported by Gomes et al 2017 (39). A Maximum Likelihood  
236 tree was generated over the 21,751SNP alignment using *RAxML-NG* (Fig. S13) and clonal  
237 complexes and phylotypes were assigned based on the PubMLST *C. acnes* definitions database  
238 ([https://pubmlst.org/bigsdb?db=pubmlst\\_pacnes\\_seqdef](https://pubmlst.org/bigsdb?db=pubmlst_pacnes_seqdef)).

## 239 **3 Results**

240

### 241 **3.1 Human ancestry analysis**

242

243 We generated 568,623,176 DNA reads from the blood stain, of which 74,244,610 reads  
244 mapped to the human reference genome (Table S1). From these, we retrieved a complete  
245 human mitochondrial (mtDNA) genome at a mean depth of coverage of 4.038x and the nuclear  
246 genome at 0.029x (Table S1). The predominant mtDNA haplotype was H2a2a1f, although we  
247 found evidence of some additional mtDNA sequences, notably a K1a15 haplotype. The ratio of  
248 sexual chromosome to autosomal DNA reads indicated that the sample donor was male (Fig.  
249 S3).

250

251 The human DNA reads showed evidence of post-mortem deamination occurring in 1% of the  
252 ends of sequencing reads, indicating authentic ancient DNA damage (Fig. S1-S2). This is similar  
253 to the degree of damage that has been observed in aDNA obtained from other human  
254 specimens of a similar age (40). For further analyses we selected only those reads that  
255 displayed C to T or G to A substitutions at the 5' or 3' end, respectively. After this procedure,  
256 the degree of mitochondrial contamination was reduced to 0-0.01%.

257

258 To explore the ancestry of Marat in the context of modern European populations, we  
259 performed Principal Component Analysis (PCA) (Figure 2a and Fig. S4-5) and unsupervised  
260 clustering in ADMIXTURE (Figure 2b). Our sample projected among modern French individuals  
261 sampled from France in the population genetic analyses. This result is broadly compatible with  
262 proposed hypotheses relating to the ancestry of Marat (2). *f4* statistics suggest a closer affinity  
263 of Marat to modern Italian, English, Sardinian, Basque and French populations relative to those  
264 from Spain (Table S3). However, these trends are subtle and we note that mixed ancestries are  
265 difficult to discern, especially when only limited genetic data is available.

266

### 267 **3.2 Metagenomic analysis**

268

269 We conducted metagenomic species assignments with the 9,788,947 deduplicated, quality  
270 controlled and low complexity filtered DNA reads (combined merged and non-merged) that  
271 did not map to the human genome (see Methods and Table S4). We used metaMix (35), a  
272 Bayesian mixture model framework developed to resolve complex metagenomic mixtures,  
273 which classified ~9% of the non-human reads into 1,328 microbial species (Table S5). The  
274 species assignments were replicated with KrakenUniq (33), which led to largely consistent, if  
275 less accurate, results (~7% classified into 3,213 species, Fig. S6, Table S6). Thus, we relied on  
276 the metaMix species assignments throughout the paper, unless stated otherwise.

277

278 We detected the presence of a wide range of microorganisms, including some expected to  
279 develop on decaying cellulose and/or dried blood, but also others recognized as opportunistic  
280 human pathogens from the following bacterial genera: *Acidovorax*, *Acinetobacter*,  
281 *Burkholderia*, *Chryseobacterium*, *Corynebacterium*, *Cutibacterium*, *Micrococcus*, *Moraxella*,  
282 *Paraburkholderia*, *Paracoccus*, *Pseudomonas*, *Rothia*, *Staphylococcus*, *Streptococcus* and the  
283 fungal genera *Aspergillus*, *Penicillium*, *Talaromyces* and *Malassezia* as well as HPV (type 179  
284 and type 5) and HHV6B viruses, albeit the latter supported by a very low numbers of reads  
285 (Table S5-S6). Some of the DNA reads, notably from *Aspergillus glaucus*, *Cutibacterium acnes*,  
286 *Malassezia restricta* and *Staphylococcus epidermis* showed typical misincorporation patterns  
287 that are considered indicative of these sequences being authentically old (Fig. S7).

288

289 We additionally sequenced the swab taken from the unstained paper sample. In this case, only  
290 96,252 pairs of reads were obtained (56,616 merged, 25,712 non-merged, 35,216

291 deduplicated and filtered combined merged and non-merged), with 52% of the reads that  
292 could be classified with metaMix into 66 species and 36% with KrakenUniq into 374 species,  
293 respectively (see Methods and Table S4). Although very little DNA could be retrieved from the  
294 section of the document that had not been blood-stained, we tried to identify microorganisms  
295 that were statistically significantly over-represented in the blood stain relative to the  
296 unstained paper. Amongst these and besides, as expected, *Homo sapiens*, different species of  
297 *Aspergillus* and *Acinetobacter* were significantly overrepresented in the blood stain (Table S5).  
298 It remains questionable however whether the unstained paper represents a suitable negative  
299 control given that the newspaper had been extensively manipulated by Marat. Significant  
300 over-representation of *Aspergillus spp.* and *Acinetobacter spp.* in the blood stain relative to the  
301 rest of the document could also be due to the blood providing better conditions for the growth  
302 of iron-limited microbes. Indeed, *Aspergillus spp.* and *Acinetobacter spp.* are commonly found  
303 in the environment but are also grown in blood agar. As such, it is plausible that these  
304 represent *post-mortem* contaminants. Indeed, for *Acinetobacter spp.* we identified no post-  
305 mortem damage pattern.

306  
307 Metagenomic analysis of historical samples can be challenging as the resulting microbial  
308 communities typically comprise an unknown mixture of endogenous species as well as  
309 contaminants, both contemporary and modern. To mitigate this problem, we relied on a  
310 'differential diagnostics' approach (Table 1), where we specifically tested for the presence of  
311 reads from pathogens that could plausibly have led to Marat's symptoms, most of which have  
312 been previously hypothesised in the literature (1–5). Such a differential approach is more  
313 stringent than the standard approach in clinical diagnostics aiming to identify the full list of  
314 microbes present in the samples after enforcement of a read-number threshold (41,42). Our  
315 approach allows limiting the number of species to be tested to a small list of plausible  
316 candidates. Second, the lack of detection of even one read from a focal microbial species by  
317 direct mapping falsifies the null hypothesis that it was not involved in the disease.

318  
319 We did not identify a single sequencing read in either the blood stain or the unstained paper  
320 for the agents of syphilis, leprosy, scrofula (tuberculosis) and diabetic candidiasis (thrush)  
321 (Table 1, Table S5). We additionally tested for scabies, which is caused by burrowing of the  
322 mite *Sarcoptes scabiei* under the skin. Since the metagenomic reference database did not  
323 include arthropod genomes, this was tested separately by blasting all the non-human reads  
324 against the *Sarcoptes scabiei* genome (GCA\_000828355.1). Again, we detected not a single  
325 read matching to *Sarcoptes scabiei*, which makes scabies an implausible cause for Marat's skin  
326 disease (Table 1, Table S5).

327  
328 Conversely, metaMix recovered 15,926 and 83 filtered DNA reads from the blood stain and the  
329 unstained paper respectively, assigned to *Malassezia restricta* a fungal pathogen causing  
330 seborrheic dermatitis, which has been previously hypothesized as one of the most plausible  
331 causes for Marat's condition (1–4). Direct mapping of all reads to *M. restricta*  
332 (GCA\_003290485.1) resulted in 19,194 reads from the blood stain dataset mapping over  
333 17.17% of the reference genome. KrakenUniq failed to identify *M. restricta*, instead assigning  
334 627 reads sequenced from the blood stain to *M. sympodialis*. However, further analysis of the  
335 *Malassezia* reads based on genome mapping pointed to most (80.3%) being uniquely assigned  
336 to *M. restricta* rather than *M. sympodialis* (Fig. S8). This allowed us to reconstruct a complete  
337 *M. restricta* mtDNA genome at 0.84X coverage. The *Malassezia* reads were evenly distributed  
338 along the full genome assembly supporting no mixing or misclassification of the species (Fig.  
339 S9).

340  
341 We placed our Marat *M. restricta* mitochondrial genome in phylogenetic context by building a  
342 maximum likelihood phylogeny including our historical strain and available present-day mtDNA

343 *M. restricta* genomes. Although the total number of samples is small, the fact that the *M.*  
344 *restricta* mtDNA molecule recovered from Marat's blood is placed basal to modern strains (Fig.  
345 S10) and exhibits some post-mortem damage (Fig. S5) further support its authenticity.

346  
347 We also recovered 587 filtered reads assigned by metaMix to *Staphylococcus aureus* in the  
348 blood stain but none in the reads obtained from the unstained paper. The differential  
349 representation in the two samples is not significantly different due to the far lower number of  
350 reads in the unstained sample (Table S5). Although a common commensal, *S. aureus* is also a  
351 frequent human pathogen and the leading cause of atopic eczema. In order to confirm the  
352 metagenomic assignments to *S. aureus*, we mapped the raw microbial reads to a series of  
353 reference genomes from various species in the *Staphylococcus* genus. This allowed us to  
354 identify 888 reads mapping against the *S. aureus* reference genome, out of which 758 uniquely  
355 mapped to *S. aureus* (Fig. S11). The presence of *S. aureus*, but with a relatively low number of  
356 reads, may be compatible with a secondary infection by *S. aureus* rather than *S. aureus* being  
357 the initial cause of Marat's condition. Alternatively, Marat, or someone who also handled the  
358 newspaper, could have carried *S. aureus* as a skin commensal.

359  
360 The most prevalent microbial species in the blood stain was *Cutibacterium acnes*  
361 (formerly *Propionibacterium acnes* (43)), which was also present in the unstained paper (Table  
362 S5). *C. acnes* is largely a commensal and part of the normal skin biota present on most healthy  
363 adult humans' skin, including in association with *S. epidermis* which we also observe in our  
364 sample (Table S5-S6, Fig. S11) (44). *C. acnes* is also a frequent contaminant in metagenomic  
365 samples (45,46). However, *C. acnes* can also be involved in severe acneiform eruptions (47)  
366 and we cannot exclude the possibility that it could have contributed to Marat's condition.  
367 86,019 reads mapped to the *C. acnes* reference genome (GCF\_000008345.1), yielding an  
368 alignment of 3.4X average coverage (Fig. S12) and exhibiting modest post-mortem damage  
369 (Fig. S7).

370  
371 A phylogeny of Marat *C. acnes* with a collection of publicly available modern strains (39,46)  
372 places our historic genome on a short branch falling basal to Type I strains, supporting its age  
373 and authenticity (Fig. S13). This phylogenetic placement suggests our Marat strain falls into *C.*  
374 *acnes* phylotype I (*C. acnes* subsp. *acnes*) rather than II (*C. acnes* subsp. *defendens*). Whilst our  
375 Marat strain does not cluster with phylotype Ia, the type more commonly associated with skin  
376 surface associated acne vulgaris (48), its position, basal to Type Ib strains cannot exclude its  
377 involvement in soft or deep tissue infections (49).

378  
379 Delineating contaminants and commensals from plausible pathogens remains challenging from  
380 this type of data source, in particular due to the absence of a suitable control. To alleviate this  
381 issue, we conducted full taxonomic assignments of two ancient metagenomes generated from  
382 historical parchment samples dating to the 17<sup>th</sup> and 18<sup>th</sup> centuries (PA1 and PA2 respectively)  
383 (36). Although these samples were obtained from livestock (ruminant) skins whereas we are  
384 working with cellulose paper, we anticipate that they may have been used and handled in a  
385 comparable way to the newspaper Marat was annotating. In this way they represent what can  
386 be considered as the most biologically comparable ancient metagenomes available to date. An  
387 equivalent metaMix analysis applied to these filtered sequencing reads (Table S7) identified  
388 not a single read assigned to *M. restricta*, *S. aureus* or *C. acnes* (Table S8). We therefore do not  
389 systematically expect a significant number of reads for the three species we suggest as most  
390 plausible candidates for Marat's condition.

391



## 392 4 Discussion

393

394 Over the last decade, ancient-pathogen genomics has made great progress by borrowing  
395 technological advances originally developed for the study of human ancient DNA (50,51).  
396 Although most microbial data has been secondarily generated from the sequencing of ancient  
397 human bones or teeth (51–54) other, rare samples, such as preserved tissues (55,56) or  
398 microscope slides from antique medical collections have been analysed (50,57). We are aware  
399 of no previous attempt to leverage ancient DNA technology to diagnose infections in historical  
400 characters, despite previous sequencing of remains from other prominent historical figures  
401 such as King Richard III and the putative blood of Louis XVI (58,59).

402

403 In this work we analysed both human and ‘off-target’ microbial reads to shed light on an  
404 important historical figure of the French Revolution and his skin condition. Due to the loss of  
405 Marat’s remains after their removal from the Panthéon in February 1795, the paper stained  
406 with his blood likely represents the only available biological material to study both his ancestry  
407 and the cause of his skin condition. Although second-generation sequencing techniques have  
408 been applied to the analysis of ancient parchments (60) our work represents the first instance  
409 where this methodological approach has been applied to old cellulose paper.

410

411 The presence and relative abundance of different microorganisms in the documents Marat  
412 was annotating is affected by their endogenous presence as well as contemporary and modern  
413 contamination both for the blood and unstained sample. Some microorganisms present in the  
414 samples might reflect skin microbiome signatures. Whilst some other microorganisms  
415 represent environmental contaminants and are likely unrelated to Marat’s condition. In order  
416 to identify the most likely candidates for Marat’s condition we tested a set of proposed  
417 diagnoses, which we considered as plausible if we detected at least one read assigned to the  
418 causative infectious agent (Table 1).

419

420 Potential conditions for which we detected not a single supportive read included syphilis,  
421 tuberculosis (scrofula), leprosy, diabetic candidiasis or scabies. We appreciate that absence of  
422 evidence for an infectious agent does not constitute incontrovertible evidence of its absence.  
423 Moreover, it is not uncommon for metagenomic diagnostics applied to clinical samples to fail  
424 to identify reads from the likely infectious agent above the predefined diagnostic threshold, or  
425 even fail to detect any read at all (42,43). As such, the absence of reads from a putative  
426 pathogen makes it less plausible as the agent of Marat’s condition but does not definitely rule  
427 them out.

428

429 Conversely, we detected and validated microbial reads for two of the conditions we tested,  
430 seborrheic dermatitis (*Malassezia spp.*), atopic dermatitis (*Staphylococcus aureus*) and cannot  
431 exclude severe acneiform eruptions (*Cutibacterium acnes*) as a third, given the age and  
432 phylogenetic position of the *C. acnes* genome we obtained. For all three cases, the number of  
433 reads would have exceeded the threshold suggested for detection in clinical metagenomic  
434 diagnostic (42,43)(41), even when considering the swab from the unstained paper as a control.

435

436 The presence of *Malassezia restricta* is of particular interest because this fungus is specialized  
437 to live on the skin (61). Although also a common commensal and contaminant in metagenomic  
438 studies, *Malassezia* has been described in various skin conditions, including dandruff, atopic  
439 eczema, folliculitis and seborrheic dermatitis (62,63). Interestingly, the latter symptoms would  
440 fit those described in Marat (5). The *M. restricta* reads we identified were not statistically  
441 significantly overrepresented in the blood’s stain relative to the unstained paper, although  
442 they could be expected to be present in both samples if someone heavily infected was holding  
443 the newspaper. Although we cannot confidently claim the reads in Marat’s blood are directly

444 associated with Marat himself, we do identify post-mortem damage in these reads and a  
445 phylogenetic placement in a modern mitochondrial DNA phylogeny consistent with these  
446 reads being indeed old (Fig. S7, Fig. S10). We also do not systematically expect the presence of  
447 *M. restricta* on parchment of a similar age (Table S8).

448  
449 Also of possible interest is the widespread presence of *Cutibacterium acnes subsp. acnes*,  
450 which although a common commensal or contaminant can also be implicated in severe  
451 acneiform eruptions, which constitutes the top hit in the blood sample and falls basal to  
452 phylotype I strains currently in circulation. As with *M. restricta*, we do not observe a single *C.*  
453 *acnes* read in two biologically equivalent historic parchment metagenomes (Table S8).  
454 *Staphylococcus aureus*, which is frequently detected in cases of atopic dermatitis, is also  
455 present in reads obtained from the blood's stain, although in fairly low number.

456  
457 Whilst our results do not allow us to reach a definite diagnosis of Marat's condition, they  
458 allowed us to cast doubt on several previous hypotheses and provide, using all the available  
459 evidence, some plausible aetiologies. We suggest that Marat could have been suffering from  
460 an advanced fungal or polymicrobial infection, either primary or secondary to another  
461 condition. Future metagenomic analysis of additional documents in Marat's possession during  
462 his assassination could help confirm the microbial composition found in this study and  
463 strengthen these observations.

464  
465 Our work further illustrates the potential of sequencing technologies for the generation of  
466 (meta-)genomic information from difficult, singular samples and opens new avenues to  
467 address medical hypotheses of major historical interest.

#### 468 **Acknowledgments and Funding**

470  
471 This work was supported by Obra Social "La Caixa" and Secretaria d'Universitats i Recerca  
472 (GRC2017-SGR880) (T.M.-B. and C.L.-F.), BFU2017-86471-P and PGC2018-101927-B-I00  
473 (MINECO/FEDER, UE) (T.M.-B) and PGC2018-095931-B-100 (MINECO/FEDER, UE) (C.L.-F.). T.M.-  
474 B. is also supported by a U01 MH106874 grant and Howard Hughes International Early Career  
475 and CERCA Programme del Departament d'Economia i Coneixement de la Generalitat de  
476 Catalunya. S.M is funded by a Wellcome Trust post-doctoral fellowship (206478/Z/17/Z). L.v.D  
477 and F.B. acknowledge financial support from the Newton Fund UK-China NSFC initiative (grant  
478 MR/P007597/1) and the BBSRC (equipment grant BB/R01356X/1). Full metagenomic reads are  
479 available at NCBI under BioProject ID XXXXX.

#### 480 481 **Author Contributions**

482  
483 P.C., L.v.D., F.B. and C.L.-F. conceived and designed the study; P.C. and C.L.B sourced the  
484 newspaper; C.B., M.A.-E. and E.L. developed and performed laboratory analysis; T.d.-D., L.v.D.,  
485 S.M. analysed data and performed computational analyses; T.d.-D., L.v.D., S.M., F.B., and C.L.-  
486 F. wrote the paper with inputs from all co-authors.

#### 487 488 **Competing Interests**

489  
490 The authors have no competing interests to declare.

491 **References**

- 492
- 493 1. Bayon HP. The Medical Career of Jean-Paul Marat. *Proc R Soc Med.* 1945;39(1):39–44.
- 494 2. Cohen JHL, Cohen EL. Doctor Marat and His Skin. *Med Hist.* 1958;2(04):281–6.
- 495 3. Dotz W. Jean Paul Marat. His life, cutaneous disease, death, and depiction by Jacques
- 496 Louis David. *Am J Dermatopathol.* 1979;1(3):247–50.
- 497 4. Jelinek JE. Jean-Paul Marat. The differential diagnosis of his skin disease. *Am J*
- 498 *Dermatopathol.* 1979;1(3):251–2.
- 499 5. Dale PM. *Medical Biographies. The Ailments of Thirty-Three Famous Persons.* Norman,
- 500 editor. Press, University of Oklahoma; 1952.
- 501 6. Coto-Segura C, Coto-Segura P, Santos-Juanes J. The Skin of a Revolutionary. *JAMA*
- 502 *Dermatology.* 2011;147(5):539.
- 503 7. Carøe C, Gopalakrishnan S, Vinner L, Mak SST, Sinding MHS, Samaniego JA, et al. Single-
- 504 tube library preparation for degraded DNA. Johnston S, editor. *Methods Ecol Evol.*
- 505 2018;9(2):410–9.
- 506 8. Martin M. Cutadapt removes adapter sequences from high-throughput sequencing
- 507 reads. *EMBnet.journal.* 2011;17(1):10.
- 508 9. Li H, Durbin R. Fast and accurate short read alignment with Burrows-Wheeler
- 509 transform. *Bioinformatics.* 2009;25(14):1754–60.
- 510 10. Langmead B, Salzberg SL. Fast gapped-read alignment with Bowtie 2. *Nat Methods.*
- 511 2012;9(4):357–9.
- 512 11. Taron UH, Lell M, Barlow A, Pajmans JLA. Testing of Alignment Parameters for Ancient
- 513 Samples: Evaluating and Optimizing Mapping Parameters for Ancient Samples Using the
- 514 TAPAS Tool. *Genes (Basel).* 2018;9(3).
- 515 12. Broad Institute. Picard.
- 516 13. Jónsson H, Ginolhac AA, Schubert M, Johnson PLFF, Orlando L, Jonsson H, et al.
- 517 mapDamage2.0: fast approximate Bayesian estimates of ancient DNA damage
- 518 parameters. In: *Bioinformatics.* England, England; 2013. p. 1682–4.
- 519 14. Skoglund P, Northoff BH, Shunkov M V, Derevianko AP, Pääbo S, Krause J, et al.
- 520 Separating endogenous ancient DNA from modern day contamination in a Siberian
- 521 Neandertal. *Proc Natl Acad Sci U S A.* 2014;111(6):2229–34.
- 522 15. García-Alcalde F, Okonechnikov K, Carbonell J, Cruz LM, Götz S, Tarazona S, et al.
- 523 Qualimap: Evaluating next-generation sequencing alignment data. *Bioinformatics.*
- 524 2012;28(20):2678–9.
- 525 16. Li H, Handsaker B, Wysoker A, Fennell T, Ruan J, Homer N, et al. The Sequence
- 526 Alignment/Map format and SAMtools. *Bioinformatics.* 2009;25(16):2078–9.
- 527 17. Lazaridis I, Patterson N, Mittnik A, Renaud G, Mallick S, Kirsanow K, et al. Ancient
- 528 human genomes suggest three ancestral populations for present-day Europeans.
- 529 *Nature.* 2014;513(7518):409–13.
- 530 18. Lazaridis I, Nadel D, Rollefson G, Merrett DC, Rohland N, Mallick S, et al. Genomic
- 531 insights into the origin of farming in the ancient Near East. *Nature.*
- 532 2016;536(7617):419–24.
- 533 19. Renaud G, Slon V, Duggan AT, Kelso J. Schmutzi: Estimation of contamination and
- 534 endogenous mitochondrial consensus calling for ancient DNA. *Genome Biol.*
- 535 2015;16(1):1–18.
- 536 20. Pierre L. Jvarkit: java-based utilities for Bioinformatics. Figshare. 2015.
- 537 21. Korneliusson TS, Albrechtsen A, Nielsen R. ANGSD: Analysis of Next Generation
- 538 Sequencing Data. *BMC Bioinformatics.* 2014;15(1):356.
- 539 22. Skoglund P, Storå J, Götherström A, Jakobsson M. Accurate sex identification of ancient
- 540 human remains using DNA shotgun sequencing. *J Archaeol Sci.* 2013;40(12):4477–82.
- 541 23. van Oven M. PhyloTree Build 17: Growing the human mitochondrial DNA tree. *Forensic*
- 542 *Sci Int Genet Suppl Ser.* 2015;5:e392--e394.

- 543 24. Robinson JT, Thorvaldsdóttir H, Winckler W, Guttman M, Lander ES, Getz G, et al.  
544 Integrative genomics viewer. *Nat Biotechnol.* 2011;29(1):24–6.
- 545 25. Patterson N, Price AL, Reich D. Population structure and eigenanalysis. *PLoS Genet.*  
546 2006;2(12):e190.
- 547 26. Wickham H. *ggplot2: Elegant Graphics for Data Analysis.* Springer-Verlag New York;  
548 2016.
- 549 27. Patterson N, Moorjani P, Luo Y, Mallick S, Rohland N, Zhan Y, et al. Ancient Admixture in  
550 Human History. *Genetics.* 2012;192(3):1065–93.
- 551 28. Alexander DH, Novembre J, Lange K. Fast model-based estimation of ancestry in  
552 unrelated individuals. *Genome Res.* 2009;19(9):1655–64.
- 553 29. Purcell S, Neale B, Todd-Brown K, Thomas L, Ferreira MAR, Bender D, et al. PLINK: A  
554 Tool Set for Whole-Genome Association and Population-Based Linkage Analyses. *Am J*  
555 *Hum Genet.* 2007;81(3):559–75.
- 556 30. Behr AA, Liu KZ, Liu-Fang G, Nakka P, Ramachandran S. *pong*: fast analysis and  
557 visualization of latent clusters in population genetic data. *Bioinformatics.*  
558 2016;32(18):2817–23.
- 559 31. Schubert M, Lindgreen S, Orlando L. AdapterRemoval v2: rapid adapter trimming,  
560 identification, and read merging. *BMC Res Notes.* 2016;9:88.
- 561 32. Schmieder R, Edwards R. Quality control and preprocessing of metagenomic datasets.  
562 *Bioinformatics.* 2011;27(6):863–4.
- 563 33. Breitwieser FP, Baker DN, Salzberg SL. KrakenUniq: confident and fast metagenomics  
564 classification using unique k-mer counts. *Genome Biol.* 2018;19(1):198.
- 565 34. Lassalle F, Spagnoletti M, Fumagalli M, Shaw L, Dyble M, Walker C, et al. Oral  
566 microbiomes from hunter-gatherers and traditional farmers reveal shifts in commensal  
567 balance and pathogen load linked to diet. *Mol Ecol.* 2018;27(1):182–95.
- 568 35. Morfopoulou S, Plagnol V. Bayesian mixture analysis for metagenomic community  
569 profiling. *Bioinformatics.* 2015;31(18):2930–8.
- 570 36. Teasdale MD, van Doorn NL, Fiddyment S, Webb CC, O’Connor T, Hofreiter M, et al.  
571 Paging through history: parchment as a reservoir of ancient DNA for next generation  
572 sequencing. *Philos Trans R Soc B Biol Sci.* 2015;370(1660):20130379.
- 573 37. McKenna A, Hanna M, Banks E, Sivachenko A, Cibulskis K, Kernytsky A, et al. The  
574 Genome Analysis Toolkit: A MapReduce framework for analyzing next-generation DNA  
575 sequencing data. *Genome Res.* 2010;20(9):254–60.
- 576 38. Kozlov AM, Darriba D, Flouri T, Morel B, Stamatakis A. RAXML-NG: a fast, scalable and  
577 user-friendly tool for maximum likelihood phylogenetic inference. *Bioinformatics.* 2019;
- 578 39. Gomes A, van Oosten M, Bijker KLB, Boiten KE, Salomon EN, Rosema S, et al. Sonication  
579 of heart valves detects more bacteria in infective endocarditis. *Sci Rep.*  
580 2018;8(1):12967.
- 581 40. Rasmussen M, Guo X, Wang Y, Lohmueller KE, Rasmussen S, Albrechtsen A, et al. An  
582 Aboriginal Australian genome reveals separate human dispersions into Asia. *Science*  
583 (80- ). 2011;334:94–8.
- 584 41. Wilson MR, Sample HA, Zorn KC, Arevalo S, Yu G, Neuhaus J, et al. Clinical Metagenomic  
585 Sequencing for Diagnosis of Meningitis and Encephalitis. *N Engl J Med.*  
586 2019;380(24):2327–40.
- 587 42. Miller S, Naccache SN, Samayoa E, Messacar K, Arevalo S, Federman S, et al. Laboratory  
588 validation of a clinical metagenomic sequencing assay for pathogen detection in  
589 cerebrospinal fluid. *Genome Res.* 2019;29(5):831–42.
- 590 43. Scholz CFP, Kilian M. The natural history of cutaneous propionibacteria, and  
591 reclassification of selected species within the genus *Propionibacterium* to the proposed  
592 novel genera *Acidipropionibacterium* gen. nov., *Cutibacterium* gen. nov. and  
593 *Pseudopropionibacterium* gen. nov. *Int J Syst Evol Microbiol.* 2016;66(11):4422–32.
- 594 44. Dreno B, Martin R, Moyal D, Henley JB, Khammari A, Seite S. Skin microbiome and acne

- 595 vulgaris: Staphylococcus, a new actor in acne. *Exp Dermatol.* 2017;26(9):798–803.
- 596 45. Salter SJ, Cox MJ, Turek EM, Calus ST, Cookson WO, Moffatt MF, et al. Reagent and  
597 laboratory contamination can critically impact sequence-based microbiome analyses.  
598 *BMC Biol.* 2014;12(1):87.
- 599 46. Mollerup S, Friis-Nielsen J, Vinner L, Hansen TA, Richter SR, Fridholm H, et al.  
600 *Propionibacterium acnes*: Disease-causing agent or common contaminant? detection in  
601 diverse patient samples by next- generation sequencing. Burnham C-AD, editor. *J Clin*  
602 *Microbiol.* 2016;54(4):980–7.
- 603 47. Platsidaki E, Dessinioti C. Recent advances in understanding *Propionibacterium acnes* (*Cutibacterium acnes*) in acne. *F1000Research.* 2018;7:F1000 Faculty Rev-1953.
- 604 48. Lomholt HB, Kilian M. Population Genetic Analysis of *Propionibacterium acnes* Identifies  
605 a Subpopulation and Epidemic Clones Associated with Acne. *PLoS One.*  
606 2010;5(8):e12277.
- 607 49. Nazipi S, Stodkilde-Jorgensen K, Scavenius C, Bruggemann H. The Skin Bacterium  
608 *Propionibacterium acnes* Employs Two Variants of Hyaluronate Lyase with Distinct  
609 Properties. *Microorganisms.* 2017;5(3):57.
- 610 50. Gelabert P, Sandoval-Velasco M, Olalde I, Fregel R, Rieux A, Escosa R, et al.  
611 Mitochondrial DNA from the eradicated European *Plasmodium vivax* and *P. falciparum*  
612 from 70-year-old slides from the Ebro Delta in Spain. *Proc Natl Acad Sci U S A.*  
613 2016;113(41):11495–500.
- 614 51. Rasmussen S, Allentoft ME, Nielsen K, Orlando L, Sikora M, Sjögren K-G, et al. Early  
615 Divergent Strains of *Yersinia pestis* in Eurasia 5,000 Years Ago. *Cell.* 2015;163(3):571–  
616 82.
- 617 52. Rascovan N, Sjögren K-G, Kristiansen K, Nielsen R, Willerslev E, Desnues C, et al.  
618 Emergence and Spread of Basal Lineages of *Yersinia pestis* during the Neolithic Decline.  
619 *Cell.* 2019;176(1):295–305.e10.
- 620 53. Margaryan A, Hansen HB, Rasmussen S, Sikora M, Moiseyev V, Khoklov A, et al. Ancient  
621 pathogen DNA in human teeth and petrous bones. *Ecol Evol.* 2018;8(6):3534–42.
- 622 54. Mühlemann B, Jones TC, Damgaard P de B, Allentoft ME, Shevnina I, Logvin A, et al.  
623 Ancient hepatitis B viruses from the Bronze Age to the Medieval period. *Nature.*  
624 2018;557(7705):418–23.
- 625 55. Marciniak S, Prowse TL, Herring DA, Klunk J, Kuch M, Duggan AT, et al. *Plasmodium*  
626 *falciparum* malaria in 1st–2nd century CE southern Italy. *Curr Biol.* 2016;26(23):R1220–  
627 2.
- 628 56. Devault AM, Golding GB, Waglechner N, Enk JM, Kuch M, Tien JH, et al. Second-  
629 Pandemic Strain of *Vibrio cholerae* from the Philadelphia Cholera Outbreak of 1849 . *N*  
630 *Engl J Med.* 2014;370(4):334–40.
- 631 57. de-Dios T, van Dorp L, Gelabert P, Carøe C, Sandoval-Velasco M, Fregel R, et al. Genetic  
632 affinities of an eradicated European *Plasmodium falciparum* strain. *Microb Genomics.*  
633 2019;mgen000289.
- 634 58. King TE, Fortes GG, Balaesque P, Thomas MG, Balding D, Delser PM, et al. Identification  
635 of the remains of King Richard III. *Nat Commun.* 2014;5:5631.
- 636 59. Olalde I, Sánchez-Quinto F, Datta D, Marigorta UM, Chiang CWK, Rodríguez JA, et al.  
637 Genomic analysis of the blood attributed to Louis XVI (1754–1793), king of France. *Sci*  
638 *Rep.* 2014;4:4666.
- 639 60. Teasdale M, Doorn N, Fiddyment S, Webb C, O’Connor T, Hofreiter M, et al. Paging  
640 through history: Parchment as a reservoir of ancient DNA for next generation  
641 sequencing. *Philos Trans R Soc B Biol Sci.* 2015;370.
- 642 61. Saunders CW, Scheynius A, Heitman J. *Malassezia* Fungi Are Specialized to Live on Skin  
643 and Associated with Dandruff, Eczema, and Other Skin Diseases. *PLOS Pathog.*  
644 2012;8(6):e1002701.
- 645 62. Ashbee R, Bignell E, editors. *Pathogenic yeasts.* In: *The yeast handbook.* Berlin

- 647 Heidelberg: Springer-Verlag; 2010. p. 209–30.  
648 63. Gupta AK, Batra R, Bluhm R, Boekhout T, Dawson TL. Skin diseases associated with  
649 Malassezia species. J Am Acad Dermatol. 2004;51(5):785–98.  
650

651 **Figures and Tables**  
652

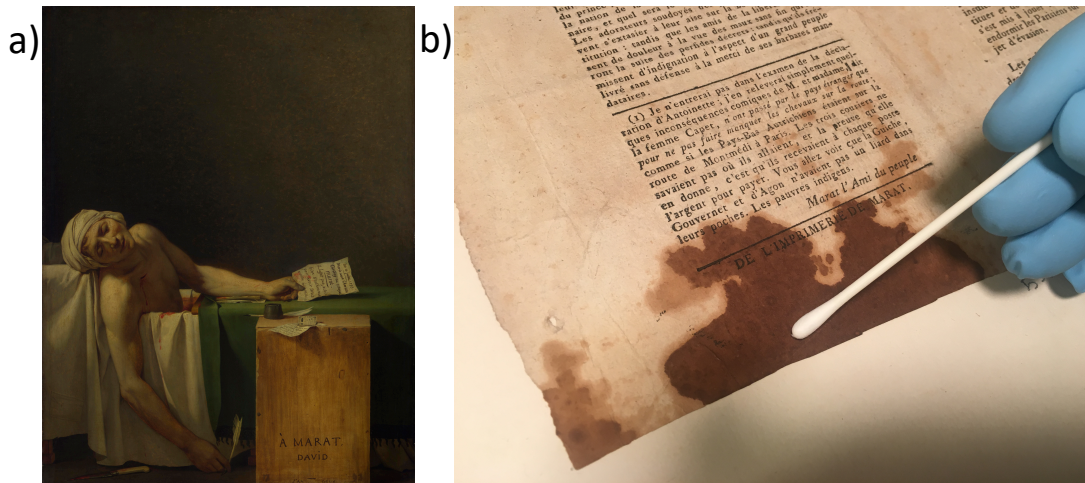

653  
654  
655 **Figure 1:** a) "La mort de Marat"; portrait of Jean-Paul Marat after his assassination, by Jacques-  
656 Louis David (1793). Preserved at Musées Royaux des Beaux-Arts de Belgique, Brussels. b)  
657 Sampling the page of *l'Ami du Peuple* stained with Marat's blood that has been analysed.  
658

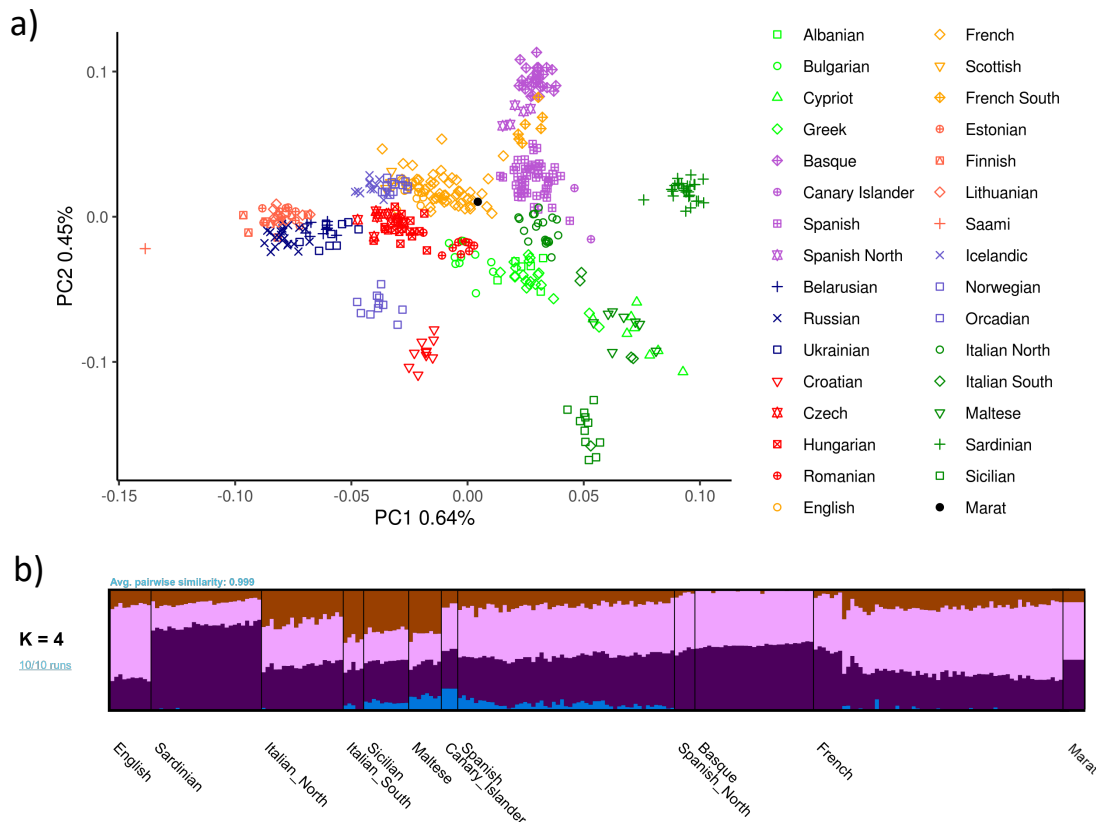

659  
660 **Figure 2:** a) Principal Component Analysis (PCA) of modern human European populations with  
661 Marat's ancient DNA reads projected. Symbols provide the country and region, where  
662 provided, as given in the legend at right. b) Admixture analysis with modern European samples  
663 and Marat. Both analyses are coherent with Marat's suggested French and Italian combined  
664 ancestry.

**Table 1:** List of diseases tested for associated agents and presence in the blood stain and the unstained paper samples. The following symbols denote the abundance of reads for each infectious agent tested. ✓: present; ✓✓: top ten; ✓✓✓: top hit; ✗: absent.

| Disease                       | Pathogen                                       | Blood | Unstained paper |
|-------------------------------|------------------------------------------------|-------|-----------------|
| Syphilis                      | <i>Treponema pallidum</i>                      | ✗     | ✗               |
| Scrofula (tuberculosis)       | <i>Mycobacterium tuberculosis</i> <sup>1</sup> | ✗     | ✗               |
| Leprosy                       | <i>Mycobacterium leprae</i>                    | ✗     | ✗               |
| Diabetic candidiasis (thrush) | <i>Candida sp.</i>                             | ✗     | ✗               |
| Scabies                       | <i>Sarcoptes scabiei</i>                       | ✗     | ✗               |
| Seborrheic dermatitis         | <i>Malassezia sp.</i>                          | ✓✓    | ✓               |
| Atopic dermatitis             | <i>Staphylococcus aureus</i>                   | ✓     | ✗               |
| Severe acneiform eruptions    | <i>Cutibacterium acnes</i>                     | ✓✓✓   | ✓✓              |

<sup>1</sup> Scrofula can also be caused by other Mycobacteria in particular *M. scrofulaceum* and *M. avium intracellulare*, which are also absent from both samples.
